# Supplementary material
Source: Preprints.org preprint supplement (doi:10.20944/preprints201812.0188.v2)
Supplement: Supplementary file 3 [file supplementary]

1 **Optimal Microbiome Networks: Macroecology**  
2 **and Criticality – Supplementary Information –**

3 **J Li<sup>a</sup>, M Convertino<sup>a,b\*</sup>**

4 <sup>a</sup> Nexus Group, Graduate School of Information Science and Technology,  
5 Hokkaido University, Sapporo, JP

6 <sup>b</sup> GI-CORE Global Station for Big Data and Cybersecurity, Hokkaido  
7 University, Sapporo, JP

8 March 25, 2019

9 *Corresponding author:* \* M. Convertino, 9 Chome, Kita 14, Nishi 9, Kita-ku, room 11-  
10 11, Graduate School of Information Science and Technology, Hokkaido University, Sapporo,  
11 Hokkaido, Japan, 060-0814, phone: +81 011-706-6491, email: [matteo@ist.hokudai.ac.jp](mailto:matteo@ist.hokudai.ac.jp)  
12

13 *Keywords:* microbiome, complex networks, species diversity, criticality, RSA, information  
14 flow, transitions  
15

## 16 Supplementary Table Captions

17 **Table S1. List of top 10 RSA species, effect on health, and reference about health**  
18 **effects.** The top 10 RSA species are reported including their documented beneficial, detri-  
19 mental, and unknown isolated effect for the human body. The most relevant reference for  
20 these documented effects is reported.

21

## 22 Supplementary Figure Captions

23 **Figure S1. RSA time series for all species.** The RSA of species is reported over time  
24 independently of the microbiome state.

25

26 **Figure S2. Exceedance probability of RSA for all species.** The epdf of abundance  
27 is plotted for the top 10 highest RSA, intermediate 10 RSA, and the least 10 RSA species.  
28 A power law is observed for the latter two RSA classes, while an exponential for the former  
29 RSA class.

30

31 **Figure S3. Inferred maximum entropy and high-threshold networks.** Maximum  
32 entropy microbial networks and high threshold networks are plotted as a function of the mi-  
33 crobiome state. Network structure is lost for the transitory and unhealthy microbiome. The  
34 color of each node is proportional to the sum of total outgoing TEs of the node (OTE) (the  
35 higher OTE, the warmer the color).

36

37 **Figure S4. Top ten RSA species for each microbiome group.** RSA is reported  
38 for the 10 highest RSA species of the healthy, transitory and unhealthy microbiome group.  
39 For the unhealthy and healthy group the top 10 highest RSA species are the most beneficial  
40 and detrimental species.

41

42 **Figure S5. Rank-entropy patterns.** The rank of total network entropy and Outgoing  
43 Transfer Entropy is plotted in semi-log plots. Many more values of OTE and network entropy  
44 are observed for the unhealthy and transitory group.

45

46 **Figure S6. Probability distribution of Outgoing Transfer Entropy.** The top, in-  
47 termediate and least 10 OTE are plotted considering their probability distribution functions  
48 for the healthy, transitory and unhealthy groups. Spline functions fitting the pdfs are shown.  
49

50 **Figure S7. Probability distribution of pairwise Transfer Entropy and RSA.**  
51 The pdf for the top, intermediate and least 10 pairwise TE and RSA classes are reported as  
52 a function of the microbiome group. Spline function fitting of the pdf is shown.  
53

54 **Figure S8. Probability distribution of structural and functional microbiome**  
55 **networks.** Pdf of structural and functional network degree and distance are shown on the  
56 left and right dependent on the microbiome group. Spline function fitting of the pdf is shown.  
57

58 **Figure S9. Local species diversity as a function of microbiome network fea-**  
59 **tures.** Polynomial functions are used to fit the relationship between macroecological indica-  
60 tors and structural network features. Only data are shown for these relationships considering  
61 functional network features since no clear fitting function is detected.  
62

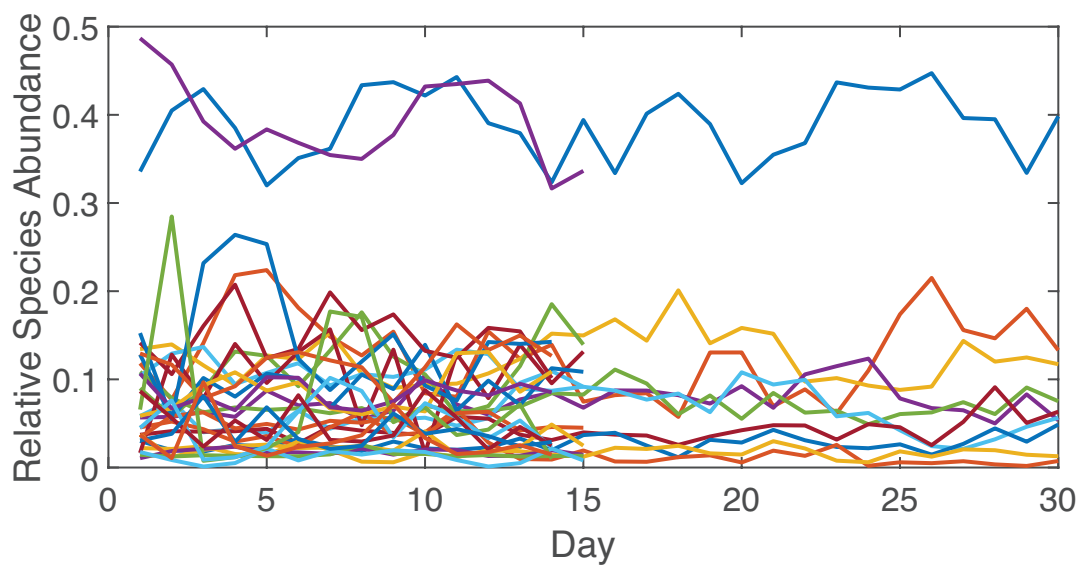

Figure S1:

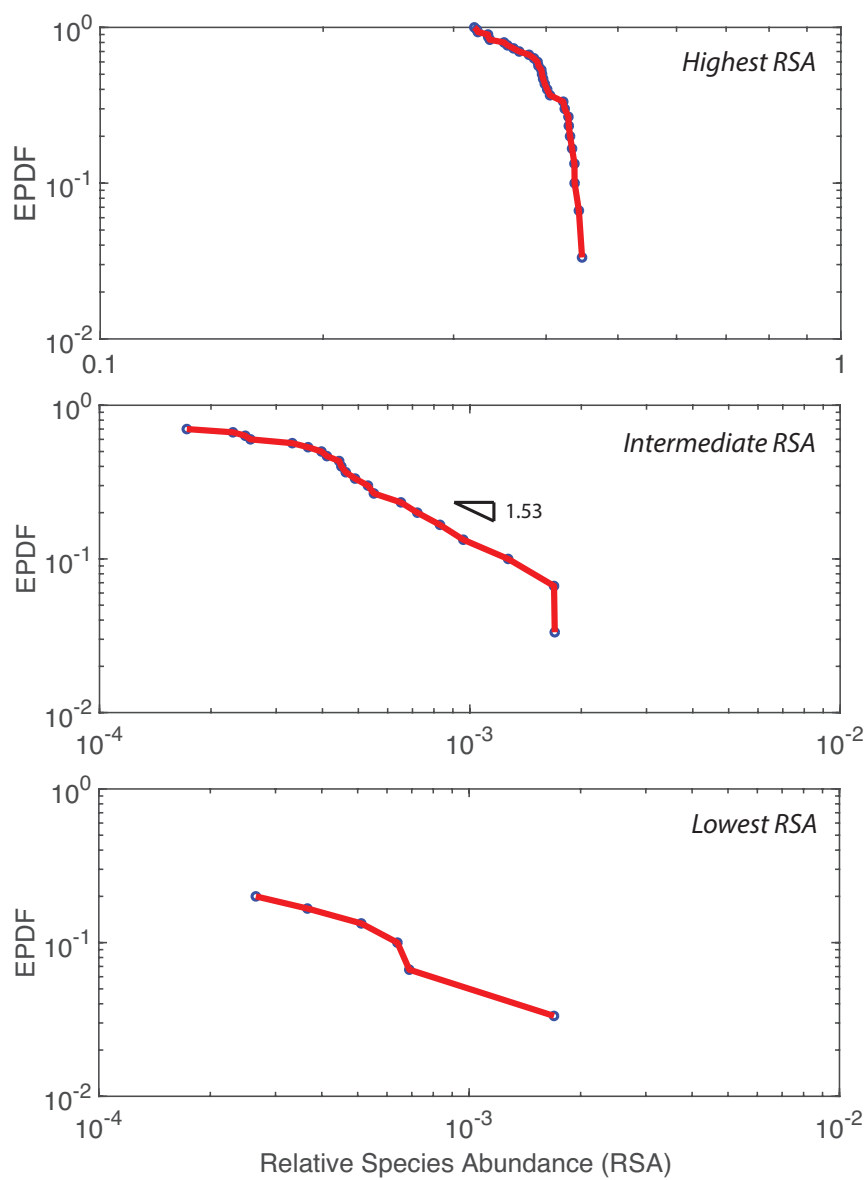

Figure S2:

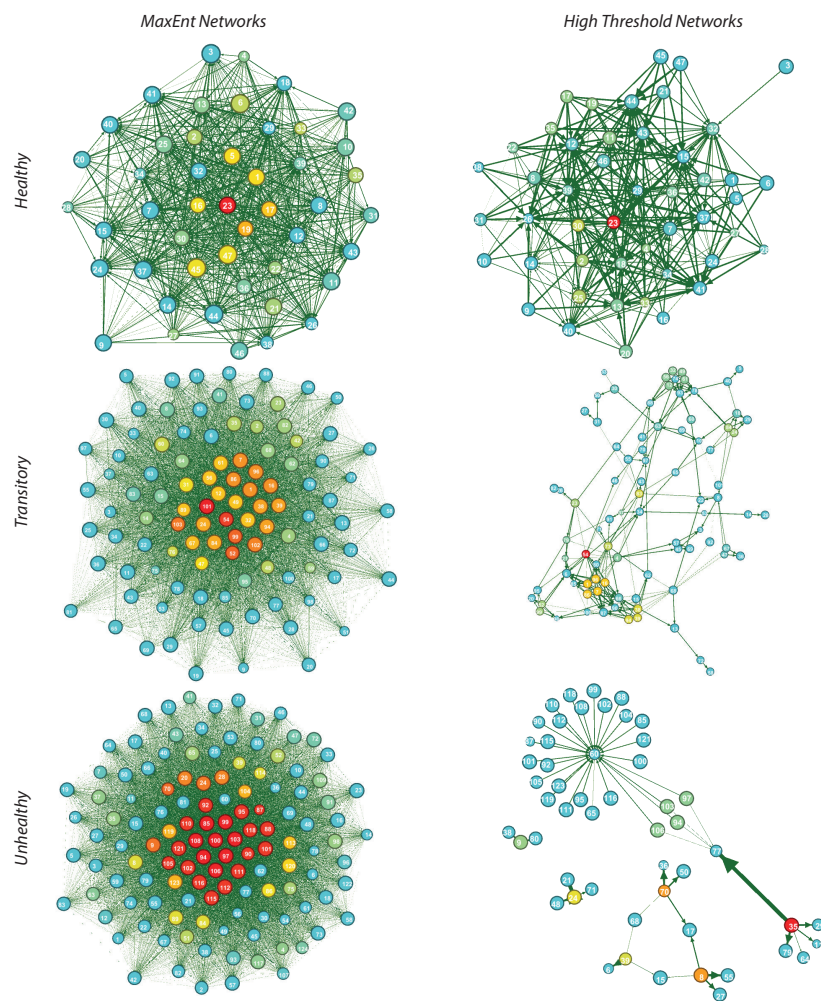

Figure S3:

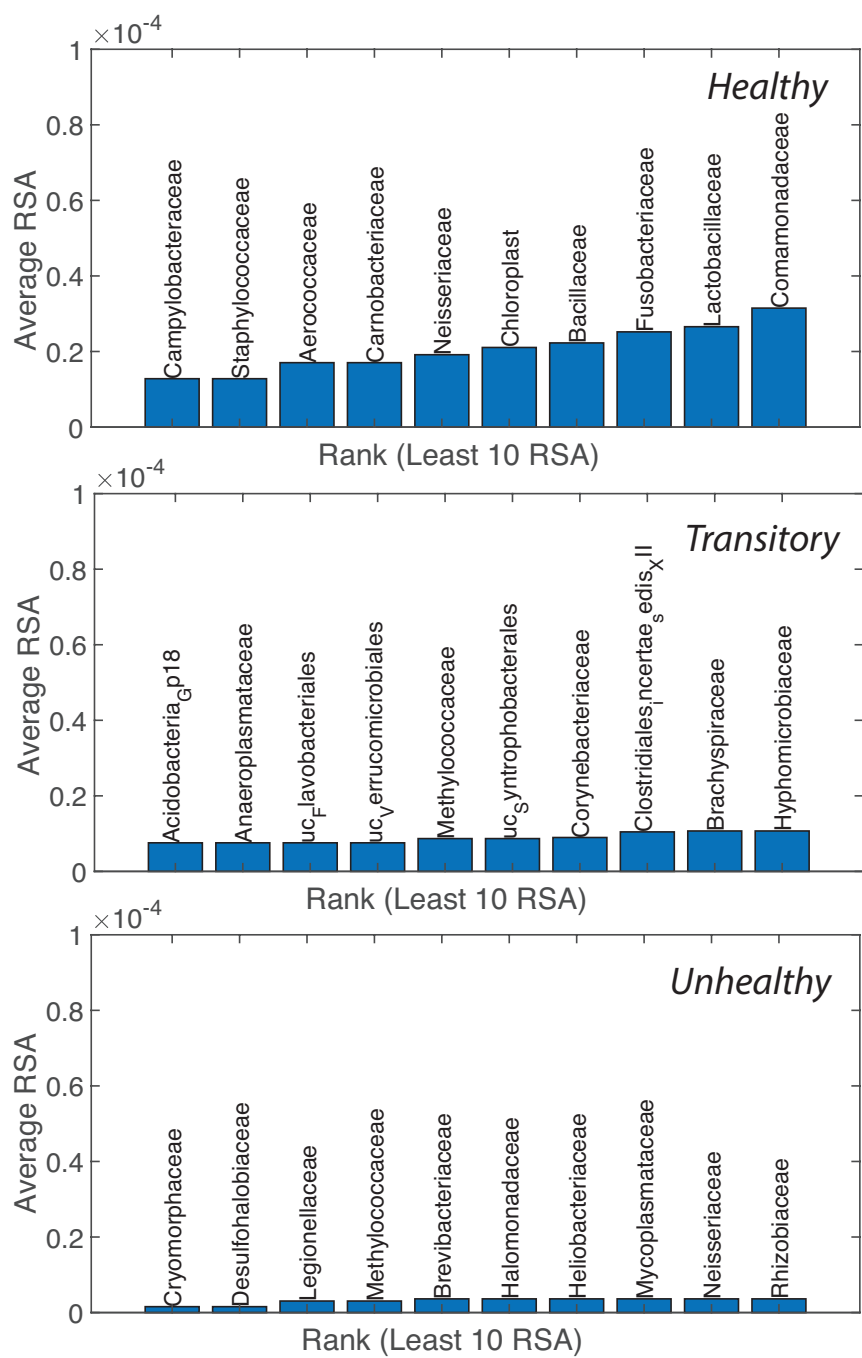

Figure S4:

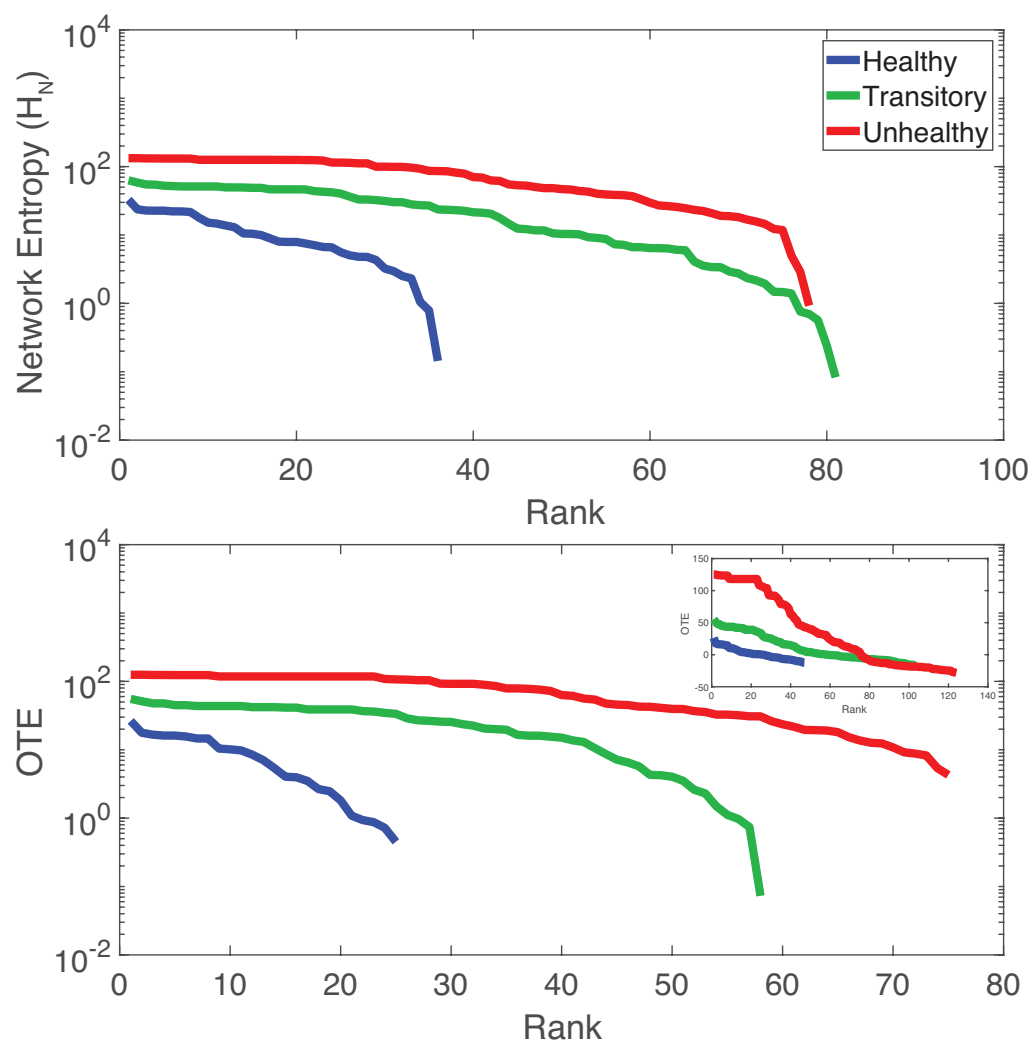

Figure S5:



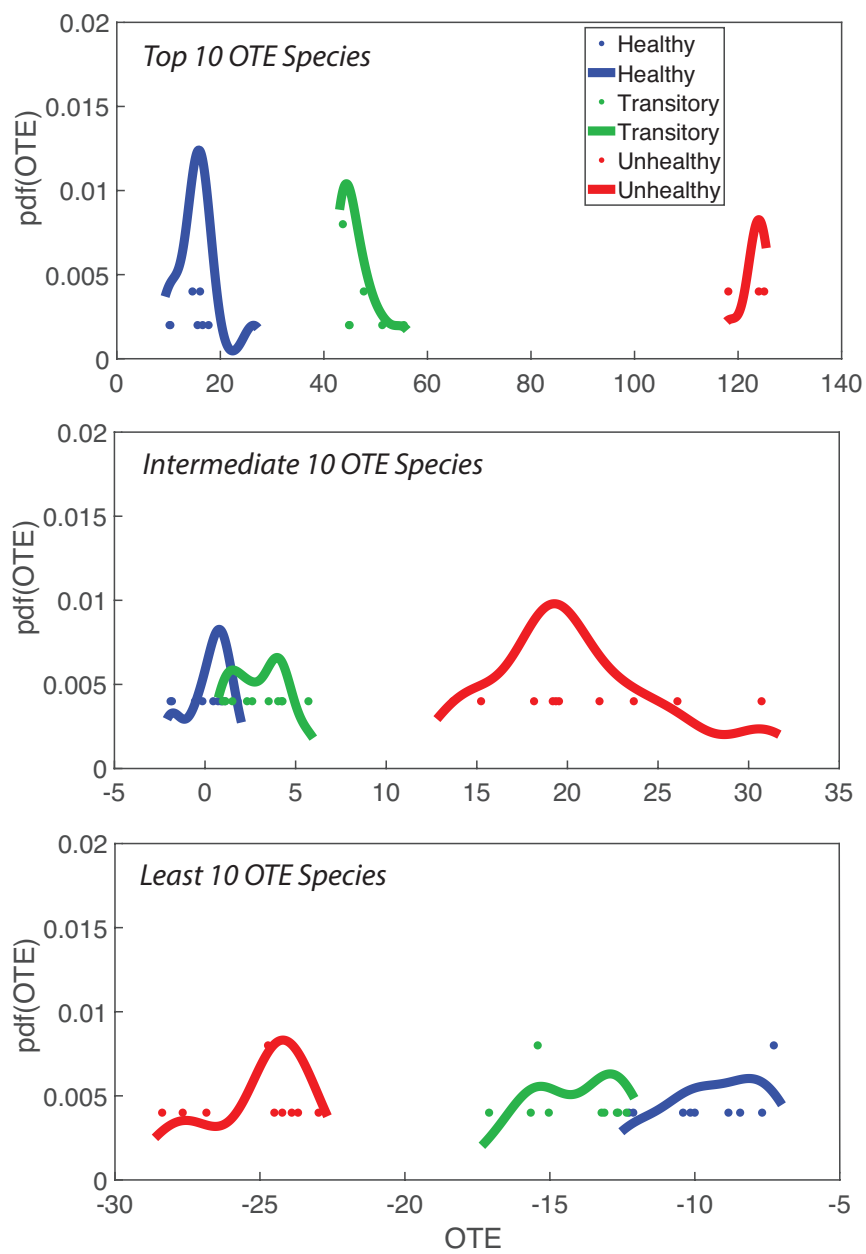

Figure S6:

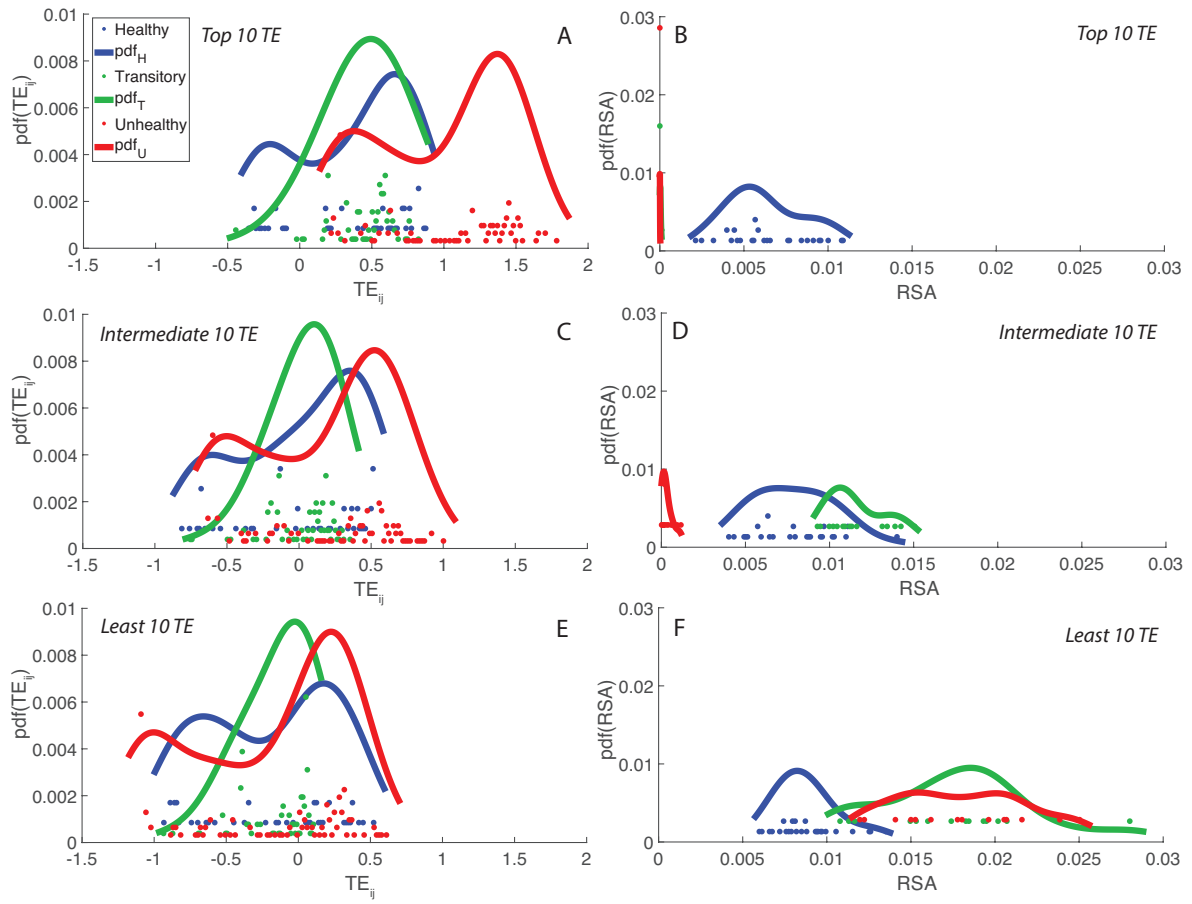

Figure S7:

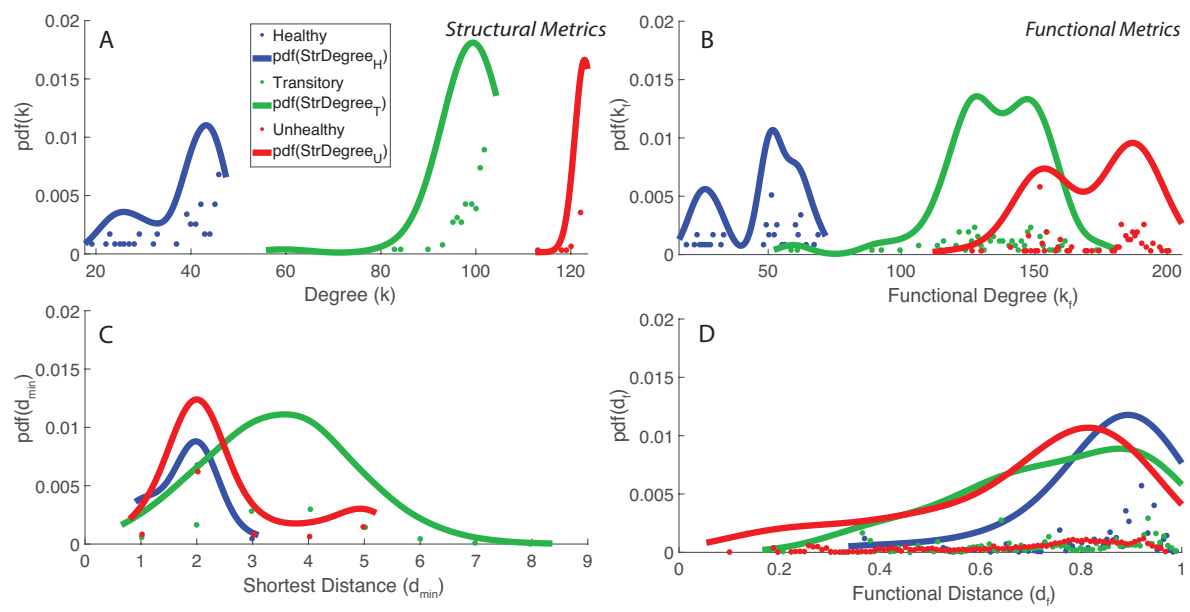

Figure S8:

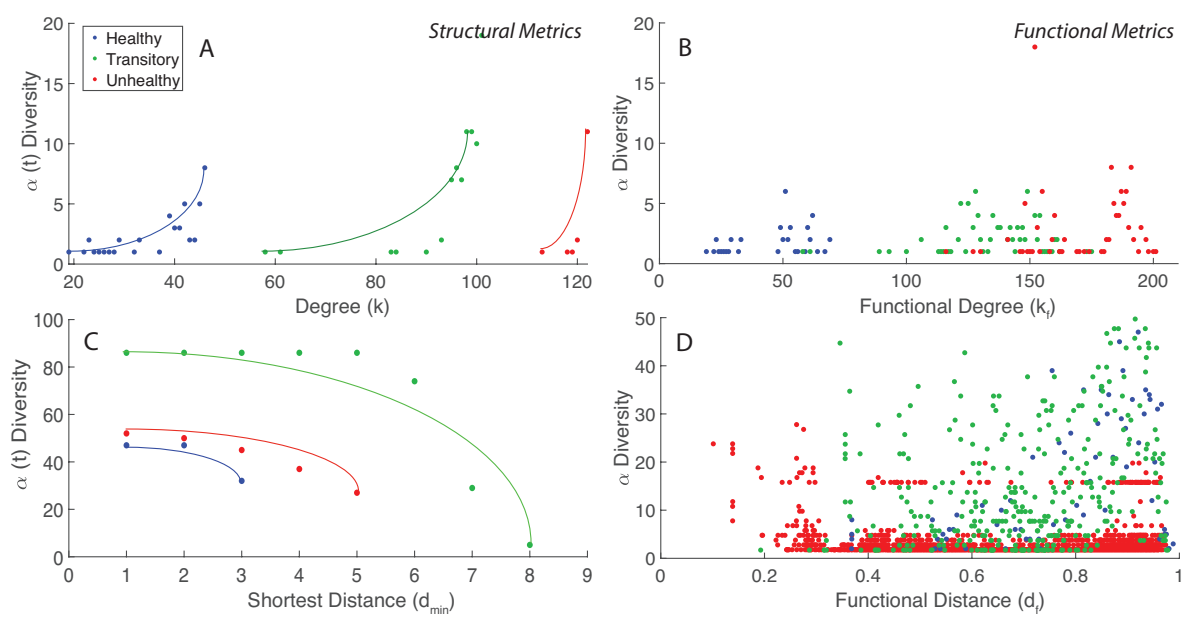

Figure S9:
