# Supplementary material
Source: Preprints.org preprint supplement (doi:10.20944/preprints201812.0188.v2)
Supplement: Supplementary file 4 [file supplementary]

**Table S1**

| Group  | Name (OTE:1-10)    | Detrimental | Beneficial | Unknown | References                                                                                                                                                                                                                                                      |
|--------|--------------------|-------------|------------|---------|-----------------------------------------------------------------------------------------------------------------------------------------------------------------------------------------------------------------------------------------------------------------|
| Health | Neisseriaceae      | ✓           |            |         | Travis A.Meredith, J. Niklas Ulrich, Chapter 122 - Infectious Endophthalmitis, Retina (Fifth Edition), Volume Three, 2013, Pages 2019-2039, <a href="https://doi.org/10.1016/B978-1-4557-0737-9.00122-3">https://doi.org/10.1016/B978-1-4557-0737-9.00122-3</a> |
|        | Lactobacillaceae   |             | ✓          |         | Dicks L., Endo A. (2014) The Family <i>Lactobacillaceae</i> : Genera Other than <i>Lactobacillus</i> . In: Rosenberg E., DeLong E.F., Lory S., Stackebrandt E., Thompson F. (eds) The Prokaryotes. Springer, Berlin, Heidelberg                                 |
|        | Halomonadaceae     |             |            | ✓       | de la Haba R.R., Arahal D.R., Sánchez-Porro C., Ventosa A. (2014) The Family <i>Halomonadaceae</i> . In: Rosenberg E., DeLong E.F., Lory S., Stackebrandt E., Thompson F. (eds) The Prokaryotes. Springer, Berlin, Heidelberg                                   |
|        | Aerococcaceae      | ✓           |            |         | Stackebrandt E. (2014) The Family <i>Aerococcaceae</i> . In: Rosenberg E., DeLong E.F., Lory S., Stackebrandt E., Thompson F. (eds) The Prokaryotes. Springer, Berlin, Heidelberg                                                                               |
|        | Carnobacteriaceae  |             | ✓          |         | Lawson P.A., Caldwell M.E. (2014) The Family <i>Carnobacteriaceae</i> . In: Rosenberg E., DeLong E.F., Lory S., Stackebrandt E., Thompson F. (eds) The Prokaryotes. Springer, Berlin, Heidelberg                                                                |
|        | Campylobacteraceae | ✓           |            |         | Lastovica A.J., On S.L.W., Zhang L. (2014) The Family <i>Campylobacteraceae</i> . In: Rosenberg E., DeLong E.F., Lory S., Stackebrandt E., Thompson F. (eds) The Prokaryotes. Springer, Berlin, Heidelberg                                                      |
|        | Staphylococcaceae  | ✓           |            |         | Lory S. (2014) The Family <i>Staphylococcaceae</i> . In: Rosenberg E., DeLong E.F., Lory S., Stackebrandt E., Thompson F. (eds) The Prokaryotes. Springer, Berlin, Heidelberg                                                                                   |
|        | Fusobacteriaceae   | ✓           |            |         | Olsen I. (2014) The Family <i>Fusobacteriaceae</i> . In: Rosenberg E., DeLong E.F., Lory S., Stackebrandt E., Thompson F. (eds) The Prokaryotes. Springer, Berlin, Heidelberg                                                                                   |
|        | Chloroplast        |             | ✓          |         |                                                                                                                                                                                                                                                                 |
|        | Micrococcaceae     | ✓           |            |         | Dastager S.G., Krishnamurthi S., Rameshkumar N., Dharne M. (2014) The Family <i>Micrococcaceae</i> . In: Rosenberg E., DeLong E.F., Lory S., Stackebrandt E., Thompson F. (eds) The Prokaryotes. Springer, Berlin, Heidelberg                                   |

|            | Name<br>(OTE:1-10)               | Detrimental | Beneficial | Unknown | References                                                                                                                                                                                                                       |
|------------|----------------------------------|-------------|------------|---------|----------------------------------------------------------------------------------------------------------------------------------------------------------------------------------------------------------------------------------|
| Transitory | Clostridiales incertae sedis XII | ✓           |            |         |                                                                                                                                                                                                                                  |
|            | Rhizobiaceae                     |             | ✓          |         | Carareto Alves L.M., de Souza J.A.M., Varani A.M., Lemos E.G.M. (2014) The Family <i>Rhizobiaceae</i> . In: Rosenberg E., DeLong E.F., Lory S., Stackebrandt E., Thompson F. (eds) The Prokaryotes. Springer, Berlin, Heidelberg |
|            | Vibrionaceae                     | ✓           |            |         | Farmer J.J. (2006) The Family Vibrionaceae. In: Dworkin M., Falkow S., Rosenberg E., Schleifer KH., Stackebrandt E. (eds) The Prokaryotes. Springer, New York, NY                                                                |
|            | Pseudomonadaceae                 | ✓           |            |         | Palleroni N.J. (1981) Introduction to the Family Pseudomonadaceae. In: Starr M.P., Stolp H., Trüper H.G., Balows A., Schlegel H.G. (eds) The Prokaryotes. Springer, Berlin, Heidelberg                                           |
|            | Corynebacteriaceae               | ✓           |            |         | Tauch A., Sandbøte J. (2014) The Family <i>Corynebacteriaceae</i> . In: Rosenberg E., DeLong E.F., Lory S., Stackebrandt E., Thompson F. (eds) The Prokaryotes. Springer, Berlin, Heidelberg                                     |
|            | Fusobacteriaceae                 | ✓           |            |         | Olsen I. (2014) The Family <i>Fusobacteriaceae</i> . In: Rosenberg E., DeLong E.F., Lory S., Stackebrandt E., Thompson F. (eds) The Prokaryotes. Springer, Berlin, Heidelberg                                                    |
|            | Acidobacteria Group 18           |             | ✓          |         |                                                                                                                                                                                                                                  |
|            | Anaeroplasmataceae               | ✓           |            |         |                                                                                                                                                                                                                                  |
|            | uncultured Flavobacteriales      | ✓           |            |         |                                                                                                                                                                                                                                  |
|            | uncultured Verrucomicrobiales    | ✓           |            |         |                                                                                                                                                                                                                                  |

|           | Name<br>(OTE:1-10) | Detrimental | Beneficial | Unknown | References                                                                                                                                                                     |
|-----------|--------------------|-------------|------------|---------|--------------------------------------------------------------------------------------------------------------------------------------------------------------------------------|
| Unhealthy | Cryomorphaceae     |             | ✓          |         | Bowman J.P. (2014) The Family <i>Cryomorphaceae</i> . In: Rosenberg E., DeLong E.F., Lory S., Stackebrandt E., Thompson F. (eds) The Prokaryotes. Springer, Berlin, Heidelberg |
|           | Desulfohalobiac    |             | ✓          |         | Kuever J. (2014) The Family <i>Desulfohalobiaceae</i> .                                                                                                                        |

|  |                    |   |   |   |                                                                                                                                                                                                                                                     |
|--|--------------------|---|---|---|-----------------------------------------------------------------------------------------------------------------------------------------------------------------------------------------------------------------------------------------------------|
|  | eae                |   |   |   | In: Rosenberg E., DeLong E.F., Lory S., Stackebrandt E., Thompson F. (eds) The Prokaryotes. Springer, Berlin, Heidelberg                                                                                                                            |
|  | Legionellaceae     | ✓ |   |   | Lory S. (2014) The Family <i>Legionellaceae</i> . In: Rosenberg E., DeLong E.F., Lory S., Stackebrandt E., Thompson F. (eds) The Prokaryotes. Springer, Berlin, Heidelberg                                                                          |
|  | Methylococcaceae   |   | ✓ |   | Bowman J.P. (2014) The Family <i>Methylococcaceae</i> . In: Rosenberg E., DeLong E.F., Lory S., Stackebrandt E., Thompson F. (eds) The Prokaryotes. Springer, Berlin, Heidelberg                                                                    |
|  | Anaplasmataceae    |   | ✓ |   | Rosenberg E. (2014) The Family <i>Anaplasmataceae</i> . In: Rosenberg E., DeLong E.F., Lory S., Stackebrandt E., Thompson F. (eds) The Prokaryotes. Springer, Berlin, Heidelberg                                                                    |
|  | Halanaerobiaceae   |   |   | ✓ | Oren A. (2014) The Order <i>Halanaerobiales</i> , and the Families <i>Halanaerobiaceae</i> and <i>Halobacteroidaceae</i> . In: Rosenberg E., DeLong E.F., Lory S., Stackebrandt E., Thompson F. (eds) The Prokaryotes. Springer, Berlin, Heidelberg |
|  | Halobacteroidaceae |   |   | ✓ | <a href="https://doi.org/10.1002/9781118960608.fbm00148">https://doi.org/10.1002/9781118960608.fbm00148</a>                                                                                                                                         |
|  | Microbacteriaceae  |   |   | ✓ | Evtushenko L.I., Takeuchi M. (2006) The Family Microbacteriaceae. In: Dworkin M., Falkow S., Rosenberg E., Schleifer KH., Stackebrandt E. (eds) The Prokaryotes. Springer, New York, NY                                                             |
|  | Halomonadaceae     |   |   | ✓ | Arahal D.R., Ventosa A. (2006) The Family Halomonadaceae. In: Dworkin M., Falkow S., Rosenberg E., Schleifer KH., Stackebrandt E. (eds) The Prokaryotes. Springer, New York, NY                                                                     |
|  | Heliobacteriaceae  |   |   | ✓ |                                                                                                                                                                                                                                                     |
